# Supplementary material for: Induction of Apoptosis via Inactivating PI3K/AKT Pathway in Colorectal Cancer Cells Using Aged Chinese Hakka Stir-Fried Green Tea Extract
Source: MDPI journal article supplement (doi:10.3390/molecules27238272), 2022-11-27
Supplement: s1 [file s1]

## Supporting Information

### **Induction of apoptosis via inactivating PI3K/AKT pathway in colorectal cancer cells using aged Chinese Hakka stir-fried green tea extract**

Xinyue Zhang<sup>1,2</sup>†, Haiying Huang<sup>3</sup>†, Shili Sun<sup>2</sup>, Dongli Li<sup>1,4</sup>, Lingli Sun<sup>2</sup>, Qiuhua Li<sup>2</sup>, Ruohong Chen<sup>2</sup>,  
Xingfei Lai<sup>2</sup>, Zhenbiao Zhang<sup>2</sup>, Xi Zheng<sup>1,4</sup>, Wing-Leung Wong<sup>1,4,\*</sup>, Shuai Wen<sup>2,\*</sup>

<sup>1</sup> School of Biotechnology and Health Sciences, Wuyi University, Jiangmen 529020, China

<sup>2</sup> Tea Research Institute, Guangdong Key Laboratory of Tea Resources Innovation & Utilization / Guangdong Academy of Agricultural Sciences, Guangzhou 510640, China

<sup>3</sup> Tea Research Institute, Meizhou Academy of Agriculture and Forestry Sciences, Meizhou 514071, China

<sup>4</sup> International Healthcare Innovation Institute (Jiangmen), Jiangmen 529040, China

† These authors contributed equally to this work.

\* Correspondence: wingleung@wyu.edu.cn (W.-L.W.); wyu2017ws@163.com (S.W.)

**(A) HPLC analysis of standard compounds for the verification of the extracted compounds from aged Chinese green tea (HSGT)**

**A list of standard compounds purchased from commercial:**

Gallic acid: **GA**; Gallocatechin: **GC**; Epigallocatechin: **EGC**; Catechin: **C**; Caffeine: **CAFF**; Epicatechin: **EC**; Epigallocatechin-3-gallate: **EGCG**; Gallocatechin-3-gallate: **GCG**; Epicatechin-3-gallate: **ECG**; Catechin gallate: **CG**

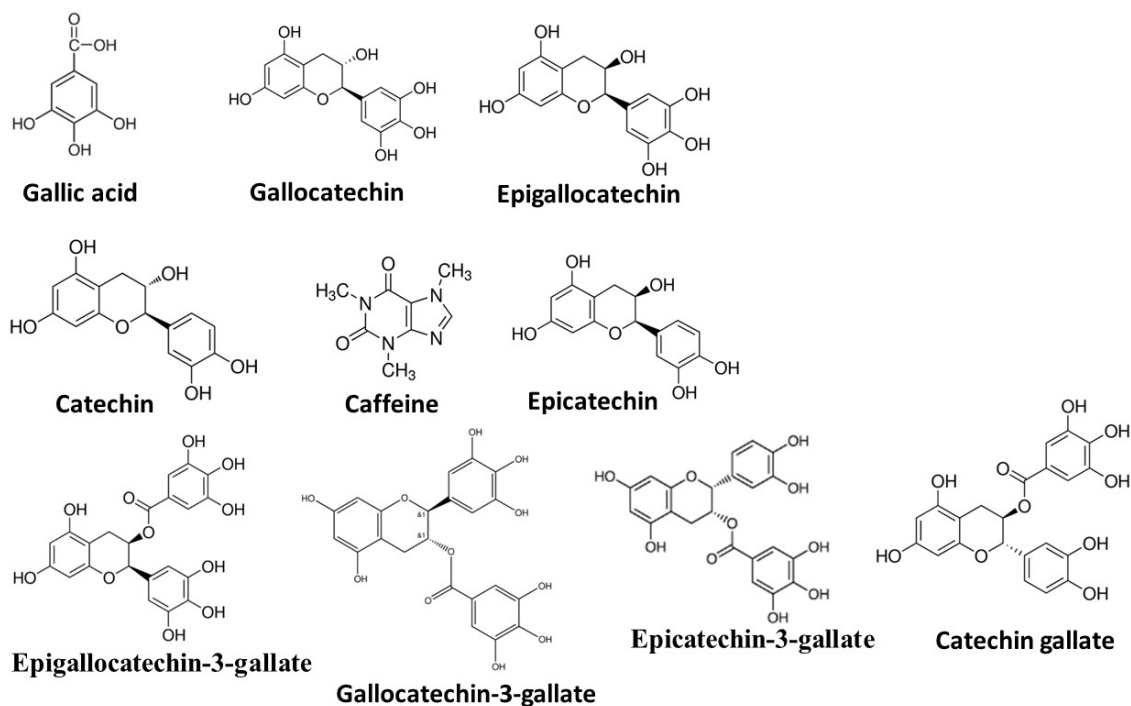

**HPLC analytical results for a mixture of the standards:**

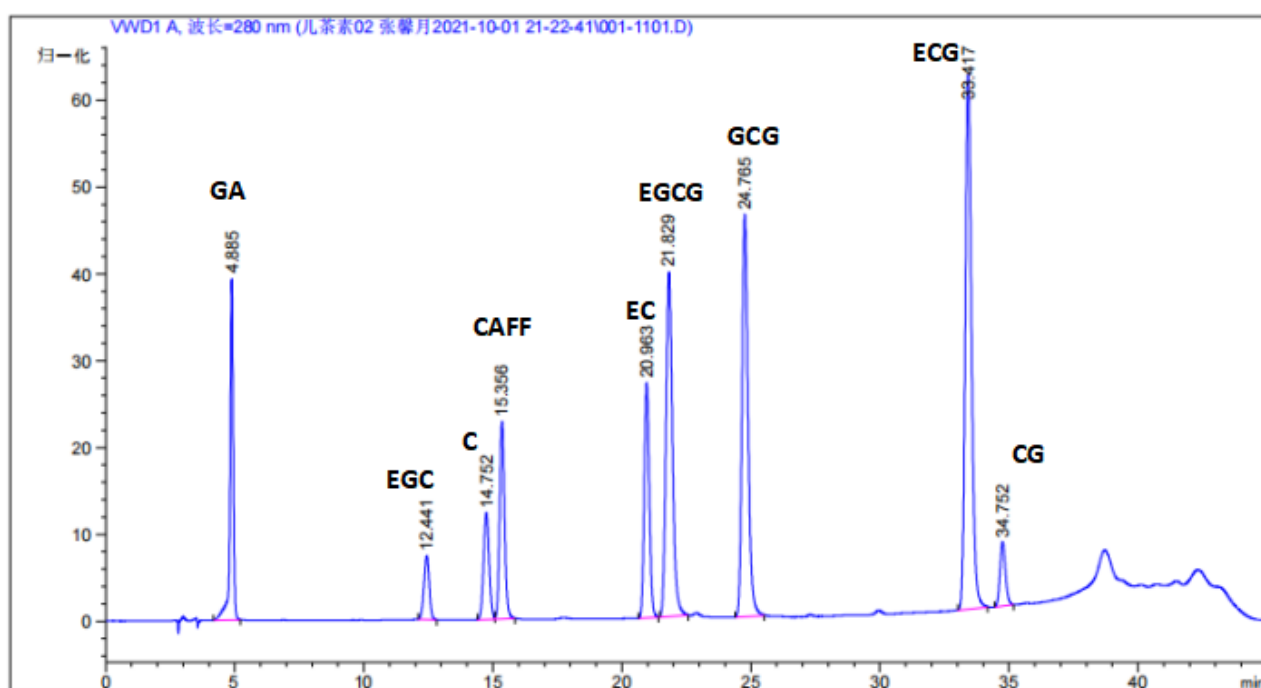

**Figure S1:** A HPLC chromatogram of a mixture of the standard compounds (HPLC detection wavelength: 280 nm). The compound corresponding to its retention time is labelled and summarized in the Table below.

| Standard compound | Retention time (min) |
|-------------------|----------------------|
| GA                | 4.885                |
| GC                | 7.514                |
| EGC               | 12.441               |
| C                 | 14.752               |
| CAFF              | 15.356               |
| EC                | 20.963               |
| EGCG              | 21.829               |
| GCG               | 24.765               |
| ECG               | 33.417               |
| CG                | 34.752               |

**(B) Qualitative and quantitative analysis of the compounds extracted from aged Chinese green tea (HSGT) with HPLC using external standard method**

**1. Analysis for the extract from tea sample: 03Y**

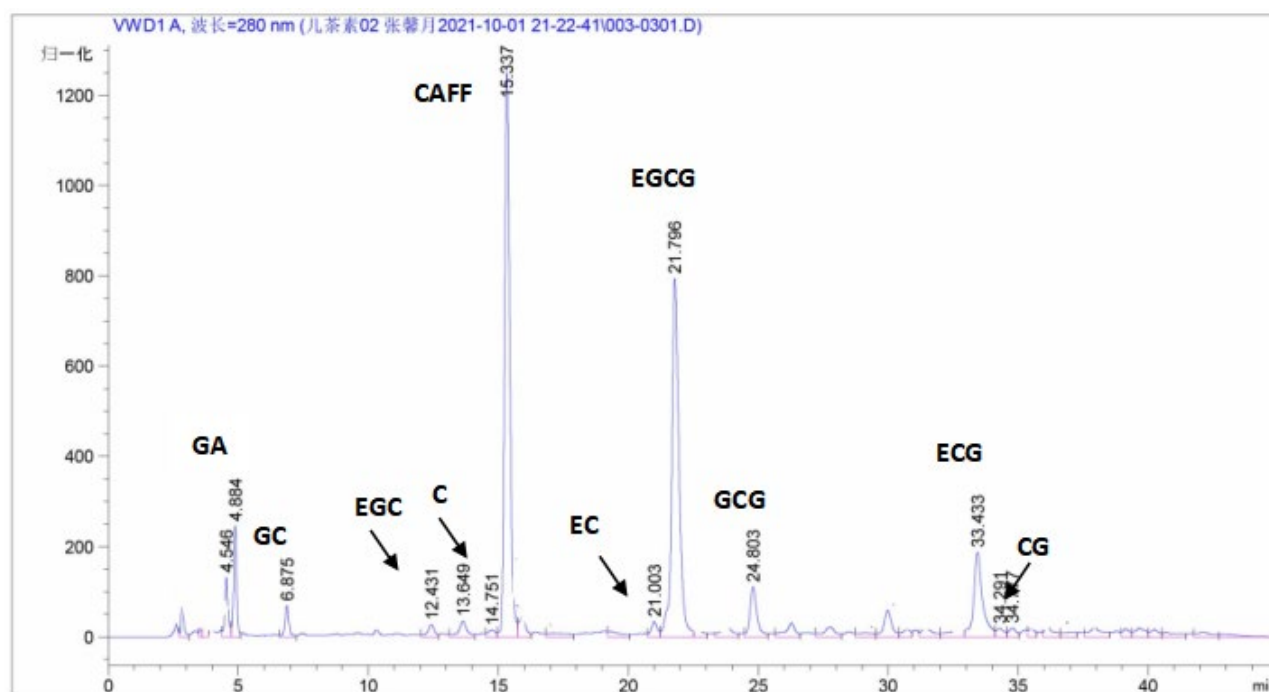

**Figure S2:** Compounds identified including: CG, catechin gallate; ECG, Epicatechin-3-gallate; GCG, gallocatechin-3-gallate; EGCG, epigallocatechin-3-gallate; EC, epicatechin; C, catechin; GC, galocatechin; EGC, epigallocatechin; GA, gallic acid; CAFF, caffeine.

## 2. Analysis for the extract from tea sample: 07Y

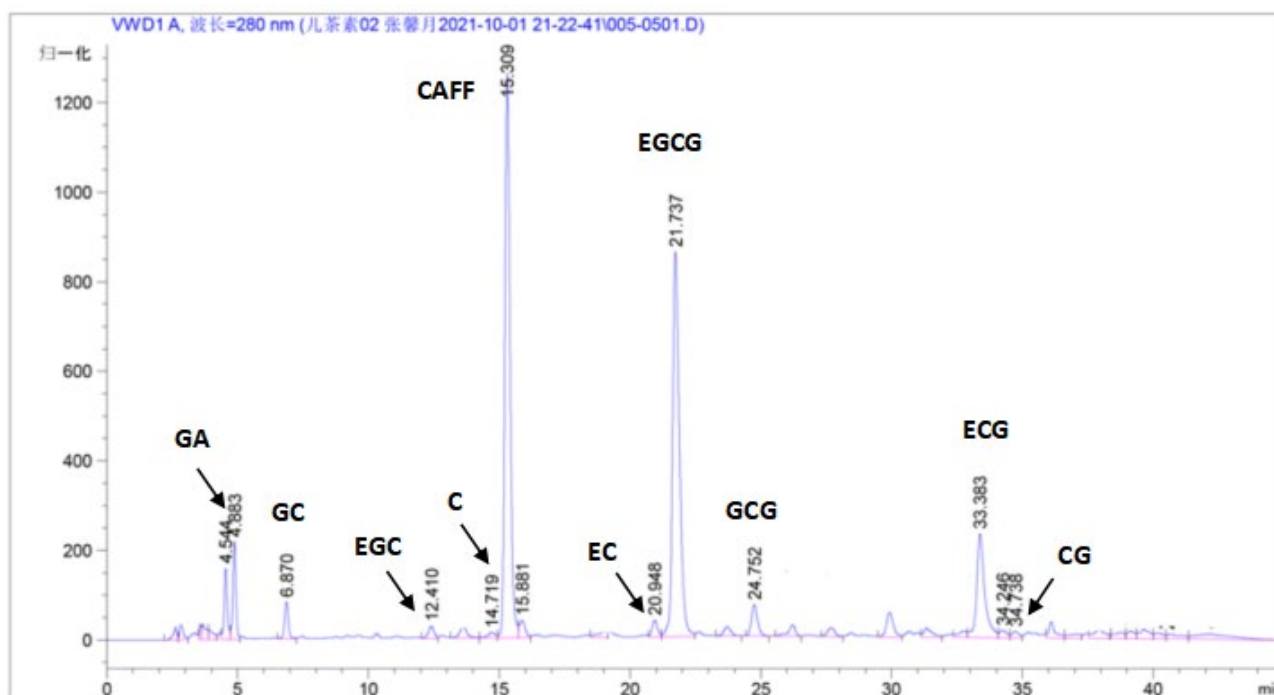

**Figure S3:** Compounds identified including: CG, catechin gallate; ECG, Epicatechin-3-gallate; GCG, gallocatechin-3-gallate; EGCG, epigallocatechin-3-gallate; EC, epicatechin; C, catechin; GC, gallocatechin; EGC, epigallocatechin; GA, gallic acid; CAFF, caffeine.

## 3. Analysis for the extract from tea sample: 11Y

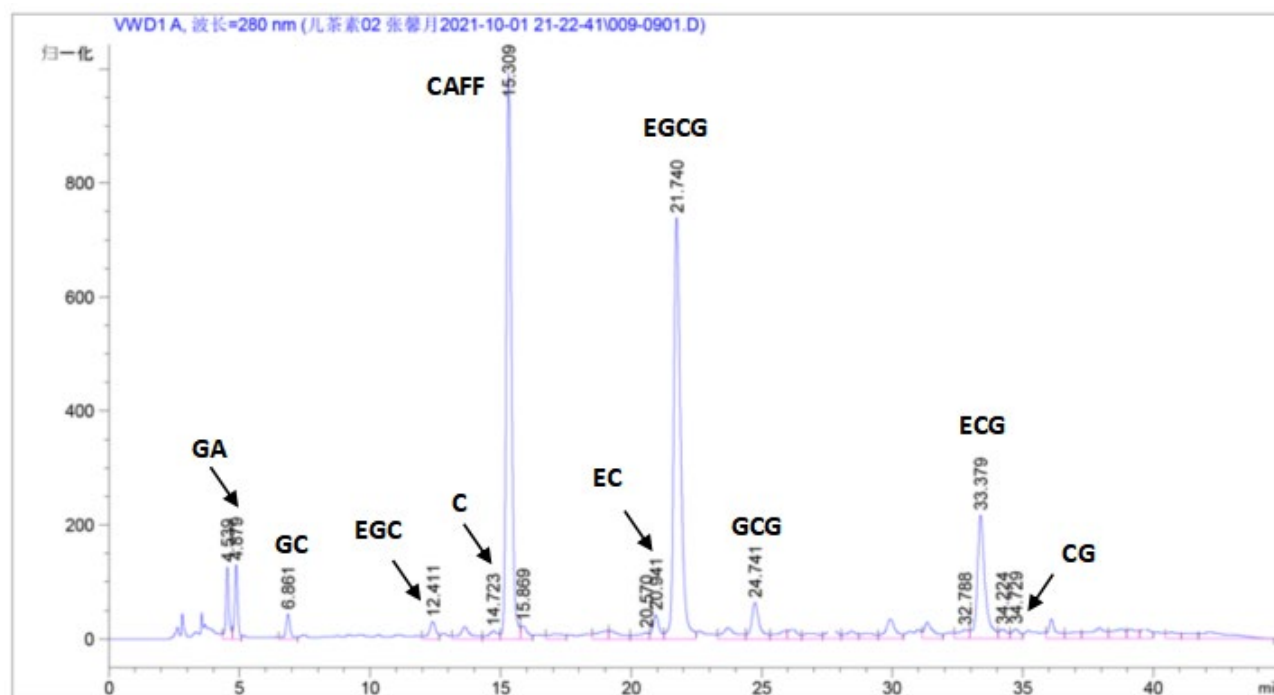

**Figure S4:** Compounds identified including: CG, catechin gallate; ECG, Epicatechin-3-gallate; GCG, gallocatechin-3-gallate; EGCG, epigallocatechin-3-gallate; EC, epicatechin; C, catechin; GC, gallocatechin; EGC, epigallocatechin; GA, gallic acid; CAFF, caffeine.

#### 4. Analysis for the extract from tea sample: 15Y

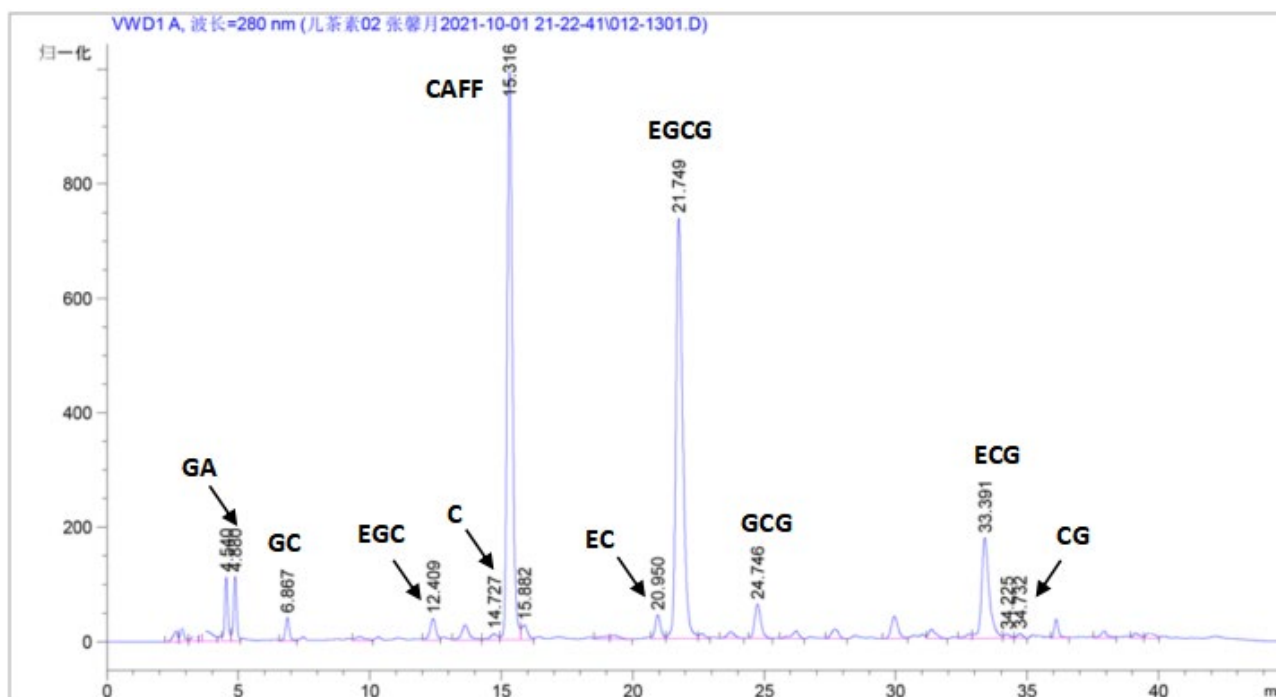

**Figure S5:** Compounds identified including: CG, catechin gallate; ECG, Epicatechin-3-gallate; GCG, gallocatechin-3-gallate; EGCG, epigallocatechin-3-gallate; EC, epicatechin; C, catechin; GC, gallocatechin; EGC, epigallocatechin; GA, gallic acid; CAFF, caffeine.

#### 5. Analysis for the extract from tea sample: 19Y

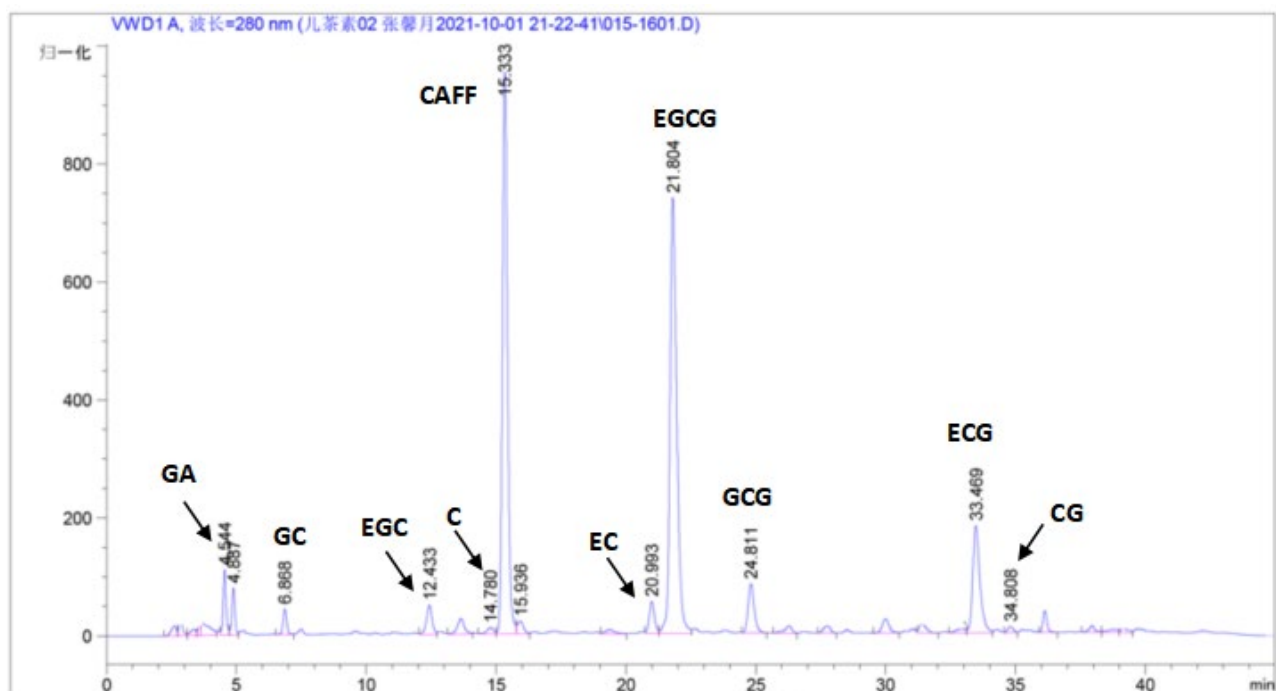

**Figure S6:** Compounds identified including: CG, catechin gallate; ECG, Epicatechin-3-gallate; GCG, gallocatechin-3-gallate; EGCG, epigallocatechin-3-gallate; EC, epicatechin; C, catechin; GC, gallocatechin; EGC, epigallocatechin; GA, gallic acid; CAFF, caffeine.

**Table S1.** The compounds identified from the extracts of the aged Chinese green tea (HSGT)

| Compound/Peak Area   | GA      | GC     | EGC    | C      | CAFF     | EC     | EGCG     | GCG     | ECG     | CG     |
|----------------------|---------|--------|--------|--------|----------|--------|----------|---------|---------|--------|
| Retention Time (min) | 4.88    | 7.51   | 13.05  | 15.41  | 16.02    | 22.38  | 23.15    | 26.23   | 36.00   | 37.00  |
| Standard mixture 1   | 338.54  | 0      | 104.24 | 181.22 | 301.11   | 367.07 | 683.22   | 758.56  | 1024.84 | 105.39 |
| Standard mixture 2   | 337.76  | 0      | 104.48 | 184.31 | 299.87   | 369.82 | 684.33   | 748.87  | 1027.66 | 109.01 |
| <b>03Y-1</b>         | 1989.29 | 669.85 | 430.59 | 359.61 | 17552.30 | 538.93 | 15592.00 | 2035.02 | 4381.74 | 361.99 |
| <b>03Y-2</b>         | 2024.96 | 755.60 | 498.01 | 317.40 | 17457.10 | 566.68 | 15413.00 | 2101.71 | 4452.00 | 403.33 |
| <b>03Y-3</b>         | 1905.78 | 674.58 | 373.01 | 292.38 | 16406.30 | 407.76 | 14168.50 | 1684.76 | 3684.00 | 156.92 |
| <b>07Y-1</b>         | 1781.31 | 866.42 | 412.85 | 245.23 | 17363.10 | 534.38 | 15654.70 | 1137.43 | 4968.73 | 273.67 |
| <b>07Y-2</b>         | 1797.10 | 906.43 | 402.83 | 242.58 | 17489.80 | 527.47 | 15451.20 | 1204.82 | 4910.65 | 287.38 |
| <b>07Y-3</b>         | 1755.44 | 889.28 | 435.00 | 294.38 | 16887.30 | 579.49 | 15153.00 | 1327.62 | 4578.22 | 247.20 |
| <b>11Y-1</b>         | 1300.96 | 591.46 | 597.70 | 344.70 | 16503.80 | 772.28 | 16537.40 | 1432.15 | 5254.98 | 269.38 |
| <b>11Y-2</b>         | 1073.88 | 517.24 | 547.85 | 347.89 | 13690.70 | 720.56 | 13506.10 | 1339.82 | 4533.44 | 366.64 |
| <b>11Y-3</b>         | 1167.52 | 525.64 | 536.31 | 299.88 | 14789.20 | 686.25 | 14853.50 | 1269.57 | 4675.50 | 227.66 |
| <b>15Y-1</b>         | 1021.42 | 501.54 | 681.36 | 277.41 | 14719.90 | 731.77 | 14915.20 | 1199.43 | 3923.16 | 126.56 |
| <b>15Y-2</b>         | 937.72  | 445.50 | 589.87 | 216.09 | 13558.70 | 614.45 | 13324.00 | 966.42  | 3542.82 | 115.71 |
| <b>15Y-3</b>         | 1113.49 | 551.73 | 744.71 | 300.36 | 16228.70 | 801.78 | 16488.20 | 1347.79 | 4342.29 | 141.71 |
| <b>19Y-1</b>         | 674.92  | 459.86 | 794.61 | 229.22 | 13440.10 | 831.37 | 14164.20 | 1445.18 | 3691.57 | 174.80 |
| <b>19Y-2</b>         | 652.98  | 439.22 | 748.73 | 212.52 | 12902.20 | 780.80 | 13388.90 | 1370.18 | 3486.25 | 149.92 |
| <b>19Y-3</b>         | 672.27  | 499.59 | 787.00 | 245.46 | 13168.70 | 798.72 | 14008.40 | 1667.30 | 3672.93 | 193.24 |

**Table S2.** The content of each compound determined from the extracts of the aged Chinese green tea (HSGT)

| Sample/Content (mg/g) | GA    | CAFF   | CG   | ECG   | GCG   | EGCG   | EC    | C    | GC    | EGC   |
|-----------------------|-------|--------|------|-------|-------|--------|-------|------|-------|-------|
| <b>03Y-1</b>          | 11.49 | 100.20 | 2.59 | 33.48 | 18.50 | 151.15 | 9.76  | 7.03 | 69.02 | 37.40 |
| <b>03Y-2</b>          | 10.85 | 92.42  | 2.69 | 31.55 | 17.72 | 138.59 | 9.54  | 5.77 | 72.27 | 39.90 |
| <b>03Y-3</b>          | 10.91 | 92.92  | 1.00 | 27.91 | 15.21 | 136.51 | 7.24  | 5.70 | 69.02 | 32.37 |
| Average               | 10.88 | 92.67  | 2.64 | 29.73 | 16.47 | 137.55 | 9.65  | 5.74 | 69.02 | 38.65 |
| SD                    | 0.03  | 0.25   | 0.05 | 0.96  | 0.39  | 1.04   | 0.11  | 0.03 | 0.00  | 1.25  |
| <b>07Y-1</b>          | 9.20  | 88.98  | 1.71 | 34.11 | 9.29  | 140.08 | 8.69  | 4.34 | 80.30 | 32.25 |
| <b>07Y-2</b>          | 9.96  | 96.15  | 1.94 | 36.16 | 10.55 | 144.26 | 9.19  | 4.61 | 90.13 | 33.79 |
| <b>07Y-3</b>          | 9.62  | 91.91  | 1.62 | 33.37 | 11.51 | 140.16 | 10.04 | 5.51 | 87.57 | 36.03 |
| Average               | 9.79  | 90.45  | 1.67 | 33.74 | 10.45 | 141.79 | 9.31  | 4.48 | 86.00 | 33.02 |
| SD                    | 0.17  | 1.47   | 0.04 | 0.37  | 0.48  | 0.04   | 0.25  | 0.13 | 1.28  | 0.77  |
| <b>11Y-1</b>          | 6.30  | 80.69  | 1.79 | 38.50 | 12.47 | 153.46 | 13.57 | 6.46 | 58.31 | 49.16 |
| <b>11Y-2</b>          | 7.05  | 75.95  | 2.51 | 33.14 | 11.65 | 151.77 | 12.62 | 6.51 | 50.86 | 45.12 |
| <b>11Y-3</b>          | 5.85  | 75.74  | 1.51 | 34.75 | 11.22 | 136.25 | 12.20 | 5.72 | 52.55 | 44.94 |
| Average               | 6.40  | 75.85  | 1.65 | 33.94 | 11.44 | 146.77 | 12.41 | 6.49 | 51.71 | 45.03 |
| SD                    | 0.22  | 0.10   | 0.14 | 0.81  | 0.21  | 0.85   | 0.21  | 0.02 | 0.85  | 0.09  |
| <b>15Y-1</b>          | 5.55  | 81.64  | 0.75 | 29.16 | 10.62 | 140.85 | 13.05 | 5.31 | 50.19 | 56.77 |
| <b>15Y-2</b>          | 5.12  | 90.05  | 0.68 | 26.60 | 8.65  | 127.38 | 11.02 | 4.21 | 45.02 | 49.90 |
| <b>15Y-3</b>          | 5.94  | 87.93  | 0.84 | 31.51 | 11.64 | 125.42 | 13.99 | 5.60 | 53.92 | 60.41 |
| Average               | 5.54  | 88.99  | 0.76 | 30.34 | 11.13 | 131.21 | 13.52 | 5.46 | 52.05 | 58.59 |
| SD                    | 0.33  | 1.06   | 0.04 | 1.18  | 0.51  | 0.98   | 0.47  | 0.14 | 1.87  | 1.82  |
| <b>19Y-1</b>          | 3.45  | 72.63  | 1.09 | 26.76 | 12.48 | 130.57 | 14.52 | 4.30 | 44.86 | 64.36 |
| <b>19Y-2</b>          | 3.37  | 70.63  | 0.92 | 25.60 | 12.00 | 125.19 | 13.80 | 4.05 | 43.41 | 61.56 |
| <b>19Y-3</b>          | 3.51  | 72.61  | 1.25 | 27.17 | 14.70 | 131.82 | 14.22 | 4.70 | 49.78 | 65.08 |
| Average               | 3.45  | 71.96  | 1.08 | 26.51 | 12.24 | 131.20 | 14.37 | 4.35 | 44.13 | 63.67 |
| SD                    | 0.03  | 0.01   | 0.08 | 0.21  | 0.24  | 0.63   | 0.15  | 0.26 | 0.73  | 0.36  |

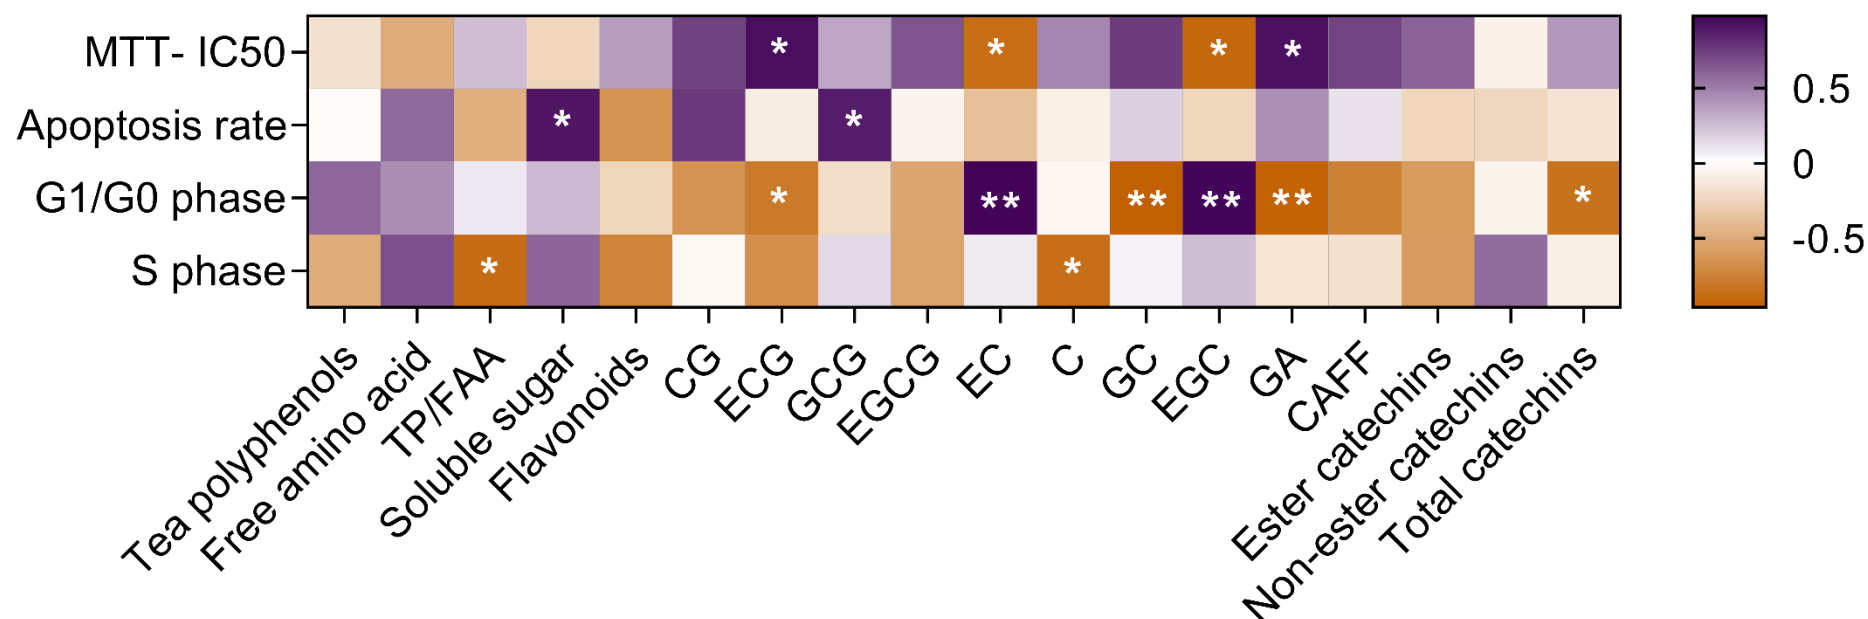

**Figure S7.** Correlation heatmap analysis of HSGTs extract active ingredients with HT-29 cell-related indexes. The HSGTs extracts were obtained from five different tea samples including **03Y**, **07Y**, **11Y**, **15Y** and **19Y**. The HT-29 cell-related indexes include cell proliferation (MTT-IC<sub>50</sub>, at 48 h), cell apoptosis (Apoptosis rate, at 48 h 0.2 mg/mL), and cell cycle blockade (G1/G0 phase, S phase, at 48 h 0.2 mg/mL). Pearson correlation analysis was performed. Purple and brown squares indicated positively and negatively correlation, respectively. The *p*-value was calculated from the one-tailed option with a confidence interval of 95%. The statistically significant correlation was showed as \**p* < 0.05 and \*\**p* < 0.01.
